# Supplementary material for: Association between occupational exposures and chronic low back pain: Protocol for a systematic review and meta-analysis
Source: PubMed Central journal article supplement (PMC10162539; doi:10.1371/journal.pone.0285327), 2023-05-05
Supplement: pone.0285327.s002.pdf [file pone.0285327.s002.pdf]

# Search strategy

## Block 1

| Mesh                                                                                                                                                                                                                                                         | Free text search in title and abstract                                                                                 |
|--------------------------------------------------------------------------------------------------------------------------------------------------------------------------------------------------------------------------------------------------------------|------------------------------------------------------------------------------------------------------------------------|
| "Occupations"[Mesh]<br>"Occupational Health"[Mesh]<br>"Occupational Diseases"[Mesh]<br>"Occupational Exposure"[Mesh]<br>"Occupational Groups"[Mesh]<br>"Work"[Mesh]<br>"Workplace"[Mesh]<br>"Workload"[Mesh]<br>"Women, Working"[Mesh]<br>"Employment"[Mesh] | occupation*<br>employ*<br>job*<br>working condition*<br>work-related<br>work-load*<br>work-place*<br>work environment* |

## Block 2

| Mesh                                                                                                                                                                                                                                                              | Free text search in title and abstract                                                                                                                                                                             |
|-------------------------------------------------------------------------------------------------------------------------------------------------------------------------------------------------------------------------------------------------------------------|--------------------------------------------------------------------------------------------------------------------------------------------------------------------------------------------------------------------|
| <b>Mechanical stress</b><br>"Stress, Mechanical"[Mesh]                                                                                                                                                                                                            |                                                                                                                                                                                                                    |
| <b>Organisational and psychosocial factors:</b><br>"Stress, Psychological"[Mesh]                                                                                                                                                                                  |                                                                                                                                                                                                                    |
| <b>Development of force:</b><br>"Lifting"[Mesh]<br>"Weight-Bearing"[Mesh] "Biomechanics"[Mesh]<br>"Moving and Lifting Patients"[Mesh]<br>"Physical Exertion"[Mesh]                                                                                                | <b>Development of force:</b><br>lift*, carry*, hold*, pull*, drag*, push*, manual handling, force*, biomechanic*, physical demand*, physically demand*.                                                            |
| <b>Working posture:</b><br>"Torsion, Mechanical"[Mesh]<br>"Postural Balance"[Mesh]<br>"Walking"[Mesh]                                                                                                                                                             | <b>Working posture:</b><br>flexion*, extension*, turning*, sitting*, kneeling*, twisting*, bending, sedentary, walking*, reaching, squatting, standing, postural balance, static AND posture, awkward AND posture. |
| <b>Working movement:</b><br>"Recovery of Function"[Mesh] "Relaxation"[Mesh]                                                                                                                                                                                       | <b>Working movement:</b><br>repetitive movement*, monotonous work, dynamic AND posture, relaxation, recovery of function, static work, dynamic load.                                                               |
| <b>Influence and demand:</b>                                                                                                                                                                                                                                      | <b>Influence and demand:</b><br>decision latitude, work demand*, job demand*, high demand*, low control, work control, job control, work influence*, demand resource*, lack of control, job strain, work strain.   |
| <b>Effort and reward:</b>                                                                                                                                                                                                                                         | <b>Effort and reward:</b><br>effort reward*, time pressure*, work overload*, recuperation*, recovery.                                                                                                              |
| <b>Social support and relations in the workplace:</b><br>"Social Support"[Mesh]<br>"Employee Performance "Appraisal"[Mesh]<br>"Organizational Culture"[Mesh]<br>"Justice/psychology"[Mesh]<br>"Communication/psychology"[Mesh]<br>"Interpersonal Relations"[Mesh] | <b>Social support and relations in the workplace:</b> social support, support system*, social network*, emotional support, justice*, injustice*, interaction*, interpersonal relation*.                            |
| <b>Job satisfaction:</b><br>"Job Satisfaction"[Mesh]<br>"Employee Grievances"[Mesh]                                                                                                                                                                               | <b>Job satisfaction:</b><br>Boredom, job satisfaction, work satisfaction, coping, work ability.                                                                                                                    |

|                                                                                                                                                                                                                                                                                                                                                                                                                                                                                                                                                                                                                                                                                                                                                                                                                                                                                                                                                                                  |                                                                                                                                                                                                                                                                                                                                                                                                                                                                                                                                                                                                                                                                                                                                                                                                                                                                                                                                                                                                                                                                                                                                                                                                                                                  |
|----------------------------------------------------------------------------------------------------------------------------------------------------------------------------------------------------------------------------------------------------------------------------------------------------------------------------------------------------------------------------------------------------------------------------------------------------------------------------------------------------------------------------------------------------------------------------------------------------------------------------------------------------------------------------------------------------------------------------------------------------------------------------------------------------------------------------------------------------------------------------------------------------------------------------------------------------------------------------------|--------------------------------------------------------------------------------------------------------------------------------------------------------------------------------------------------------------------------------------------------------------------------------------------------------------------------------------------------------------------------------------------------------------------------------------------------------------------------------------------------------------------------------------------------------------------------------------------------------------------------------------------------------------------------------------------------------------------------------------------------------------------------------------------------------------------------------------------------------------------------------------------------------------------------------------------------------------------------------------------------------------------------------------------------------------------------------------------------------------------------------------------------------------------------------------------------------------------------------------------------|
| <p><b>Education and learning:</b><br/>"Staff Development"[Mesh]</p> <p><b>Conflict, violence or harassment:</b><br/>"Bullying"[Mesh]<br/>"Prejudice"[Mesh]<br/>"Social Discrimination"[Mesh]</p> <p><b>Working time:</b><br/>"Work Schedule Tolerance"[Mesh]</p> <p><b>Job insecurity:</b><br/>"Personnel Downsizing"[Mesh]</p> <p><b>Chemical and biological substances:</b><br/>"Air Pollution"[Mesh]<br/>"Air Pollutants"[Mesh]<br/>"Solvents"[Mesh]<br/>"Fluids and Secretions"[Mesh]</p> <p><b>Contact with chemicals:</b><br/>"Toxic Actions"[Mesh]</p> <p><b>Noise:</b><br/>"Noise"[Mesh]</p> <p><b>Vibrations:</b><br/>"Vibration"[Mesh]<br/>"Automobile Driving"[Mesh]<br/>"Motor Vehicles"[Mesh]</p> <p><b>Radiation:</b><br/>"Radiation"[Mesh]<br/>"Air Pollution, Radioactive"[Mesh]</p> <p><b>Temperature:</b><br/>"Hot Temperature"[Mesh]<br/>"Cold Temperature"[Mesh]<br/>"Climate"[Mesh]</p> <p><b>Infected materials:</b><br/>"Communicable Diseases"[Mesh]</p> | <p><b>Education and learning:</b><br/>skill discretion*, staff development.</p> <p><b>Conflict, violence or harassment:</b><br/>harass*, workplace conflict*, workplace violen*, silent workplace*, victimization*, bullying, role ambiguity, role conflict*, work role*, discrimination.</p> <p><b>Working time:</b><br/>working hour*, working time, shift work*, work shift*, day-time, night-time, temporary work, full-time, part-time, flexible work*, lean production.</p> <p><b>Job insecurity:</b><br/>organizational change, job security, job insecurity.</p> <p><b>Chemical and biological substances:</b><br/>pollut*, indoor air*, airborne, passive smok*, solvent*, smok* AND pollute*.</p> <p><b>Contact with chemicals:</b><br/>hazardous chemical*, hazardous material*, hazardous substance*, toxic action*, pesticide*, poison*.</p> <p><b>Noise:</b><br/>noise*</p> <p><b>Vibrations:</b><br/>vibrat*, driving, vehicle*, truck*, lorry/lorries, automobile*, car/cars, buses, hand tool*, hand-held tool*, power tool*.</p> <p><b>Radiation:</b><br/>radiation*</p> <p><b>Temperature:</b><br/>climate*, cold temperature*, hot temperature*.</p> <p><b>Infected materials:</b><br/>contagious* communicable disease*</p> |
|----------------------------------------------------------------------------------------------------------------------------------------------------------------------------------------------------------------------------------------------------------------------------------------------------------------------------------------------------------------------------------------------------------------------------------------------------------------------------------------------------------------------------------------------------------------------------------------------------------------------------------------------------------------------------------------------------------------------------------------------------------------------------------------------------------------------------------------------------------------------------------------------------------------------------------------------------------------------------------|--------------------------------------------------------------------------------------------------------------------------------------------------------------------------------------------------------------------------------------------------------------------------------------------------------------------------------------------------------------------------------------------------------------------------------------------------------------------------------------------------------------------------------------------------------------------------------------------------------------------------------------------------------------------------------------------------------------------------------------------------------------------------------------------------------------------------------------------------------------------------------------------------------------------------------------------------------------------------------------------------------------------------------------------------------------------------------------------------------------------------------------------------------------------------------------------------------------------------------------------------|

### Block 3

| Mesh                                                                                                                                                                                                                                                                                                                                                                 | Free text search in title and abstract                                                                                                                                                                                                                                                                                                                                                                                                                                                                                                                                                                                                                                                        |
|----------------------------------------------------------------------------------------------------------------------------------------------------------------------------------------------------------------------------------------------------------------------------------------------------------------------------------------------------------------------|-----------------------------------------------------------------------------------------------------------------------------------------------------------------------------------------------------------------------------------------------------------------------------------------------------------------------------------------------------------------------------------------------------------------------------------------------------------------------------------------------------------------------------------------------------------------------------------------------------------------------------------------------------------------------------------------------|
| <p><b>Back problems – anatomy and disease:</b><br/>"Back" [Mesh]<br/>"Spine" [Mesh]<br/>"Pelvis" [Mesh]<br/>"Pain" [Mesh]<br/>"Pain Measurement" [Mesh]<br/>"Cumulative Trauma Disorders" [Mesh] "Musculoskeletal Diseases" [Mesh]<br/>"Back Pain" [Mesh]<br/>"Back Injuries" [Mesh]<br/>"Spinal Diseases" [Mesh]<br/>"Pelvic Pain" [Mesh]<br/>"Sciatica" [Mesh]</p> | <p><b>Back problems – anatomy and disease:</b><br/>back, spine*, spinal*, trunk*, lumbar*, pelvis*, sacrum, lumbosacral*, lumbosacral*, intervertebral disk*, intervertebral disc*, thoracic vertebrae, thoracic vertebra.</p> <p>pain, ache*, musculoskeletal disease*, musculoskeletal disorder*, cumulative trauma disorder*, nerve entrapment.</p> <p>back pain, backache*, back injur*, spinal disease*, spine disease*, spinal injur* OR spine injur*, intervertebral disk degeneration, intervertebral disc degeneration, spinal osteochondros*, spine osteochondros*, Scheuermann*, spinal stenosis*, spondylitis, spondylarthritis, spondylosis, lumbago, sciatica, pelvic pain.</p> |

## Block 4

Limits: English, Danish, Norwegian, Swedish.  
Publication Date: from 2014/01/01 to 2021/09/20.

### Search string

((("Back"[MeSH Terms] OR "spine"[MeSH Terms] OR "Pelvis"[MeSH Terms] OR ("Back"[Title/Abstract] OR "spine"[Title/Abstract] OR "spinal"[Title/Abstract] OR "trunk"[Title/Abstract] OR "lumbar"[Title/Abstract] OR "pelvis"[Title/Abstract] OR "sacrum"[Title/Abstract] OR "lumbo sacral"[Title/Abstract] OR "lumbosacral"[Title/Abstract] OR "intervertebral disk"[Title/Abstract] OR "intervertebral disc"[Title/Abstract] OR "thoracic vertebrae"[Title/Abstract] OR "thoracic vertebra"[Title/Abstract])) AND ("Pain"[MeSH Terms] OR "Pain Measurement"[MeSH Terms] OR "Cumulative Trauma Disorders"[MeSH Terms] OR "Musculoskeletal Diseases"[MeSH Terms] OR ("Pain"[Title/Abstract] OR "ache"[Title/Abstract] OR "musculoskeletal disease"[Title/Abstract] OR "musculoskeletal disorder"[Title/Abstract] OR "cumulative trauma disorder"[Title/Abstract] OR "nerve entrapment"[Title/Abstract])))) OR ("Back Pain"[MeSH Terms] OR "Back Injuries"[MeSH Terms] OR "Spinal Diseases"[MeSH Terms] OR "Pelvic Pain"[MeSH Terms] OR "Sciatica"[MeSH Terms] OR ("Back Pain"[Title/Abstract] OR "backache"[Title/Abstract] OR "back injur"[Title/Abstract] OR "spinal disease"[Title/Abstract] OR "spine disease"[Title/Abstract] OR "spinal injur"[Title/Abstract] OR "spine injur"[Title/Abstract] OR "intervertebral disk degeneration"[Title/Abstract] OR "intervertebral disc degeneration"[Title/Abstract] OR "spinal osteochondros"[Title/Abstract] OR "spine osteochondros"[Title/Abstract] OR "scheuermann"[Title/Abstract] OR "spinal stenosis"[Title/Abstract] OR "spondylitis"[Title/Abstract] OR "spondylarthritis"[Title/Abstract] OR "spondylosis"[Title/Abstract] OR "lumbago"[Title/Abstract] OR "Sciatica"[Title/Abstract] OR "Pelvic Pain"[Title/Abstract])) AND ("Work"[MeSH Terms] OR "Workload"[MeSH Terms] OR "Workplace"[MeSH Terms] OR "Occupations"[MeSH Terms] OR "Occupational Health"[MeSH Terms] OR "Occupational Diseases"[MeSH Terms] OR "Occupational Groups"[MeSH Terms] OR "Occupational Exposure"[MeSH Terms] OR "women, working"[MeSH Terms] OR "Employment"[MeSH Terms:noexp] OR ("work-related"[Title/Abstract] OR "work load"[Title/Abstract] OR "workload"[Title/Abstract] OR "workplace"[Title/Abstract] OR "workplace"[Title/Abstract] OR "work environment"[Title/Abstract] OR "working condition"[Title/Abstract] OR "occupation"[Title/Abstract] OR "job"[Title/Abstract] OR "employ"[Title/Abstract]) NOT ("medline"[Filter] OR "oldmedline"[Filter])) AND ("stress, mechanical"[MeSH Terms] OR "Lifting"[MeSH Terms] OR "Moving and Lifting Patients"[MeSH Terms] OR "Weight-Bearing"[MeSH Terms] OR "Physical Exertion"[MeSH Terms] OR "torsion, mechanical"[MeSH Terms] OR "Postural Balance"[MeSH Terms] OR "Walking"[MeSH Terms] OR "recovery of function"[MeSH Terms] OR "Relaxation"[MeSH Terms] OR ("static"[Title/Abstract] AND ("postural"[All Fields] OR "posturally"[All Fields] OR "posture"[MeSH Terms] OR "posture"[All Fields] OR "postures"[All Fields] OR "postured"[All Fields] OR "posturing"[All Fields])) OR ("awkward"[Title/Abstract] AND ("postural"[All Fields] OR "posturally"[All Fields] OR "posture"[MeSH Terms] OR "posture"[All Fields] OR "postures"[All Fields] OR "postured"[All Fields] OR "posturing"[All Fields])) OR ("dynamic"[Title/Abstract] AND ("postural"[All Fields] OR "posturally"[All Fields] OR "posture"[MeSH Terms] OR "posture"[All Fields] OR "postures"[All Fields] OR "postured"[All Fields] OR "posturing"[All Fields])) OR "static work"[Title/Abstract] OR "dynamic load"[Title/Abstract] OR "lift"[Title/Abstract] OR "carry"[Title/Abstract] OR "hold"[Title/Abstract] OR "pull"[Title/Abstract] OR "drag"[Title/Abstract] OR "push"[Title/Abstract] OR "manual handling"[Title/Abstract] OR "force"[Title/Abstract] OR "biomechanic"[Title/Abstract] OR "walking"[Title/Abstract] OR "Postural Balance"[Title/Abstract] OR "flexion"[Title/Abstract] OR "extension"[Title/Abstract] OR "turning"[Title/Abstract] OR "sitting"[Title/Abstract] OR "kneeling"[Title/Abstract] OR "squatting"[Title/Abstract] OR "twisting"[Title/Abstract] OR "bending"[Title/Abstract] OR "reaching"[Title/Abstract] OR "standing"[Title/Abstract] OR "sedentary"[Title/Abstract] OR "repetitive movement"[Title/Abstract] OR "monotonous work"[Title/Abstract] OR "Relaxation"[Title/Abstract] OR "recovery of function"[Title/Abstract] OR "physical demand"[Title/Abstract] OR "physically demand"[Title/Abstract] OR ("stress, psychological"[MeSH Terms] OR "Social Support"[MeSH Terms] OR "Job Satisfaction"[MeSH Terms] OR "Work Schedule Tolerance"[MeSH Terms] OR "Employee Performance Appraisal"[MeSH Terms] OR "Employee Grievances"[MeSH Terms] OR "social justice/psychology"[MeSH Terms] OR "Personnel Downsizing"[MeSH Terms] OR "Staff Development"[MeSH Terms] OR "Organizational Culture"[MeSH Terms] OR "Bullying"[MeSH Terms] OR "Prejudice"[MeSH Terms] OR "Social Discrimination"[MeSH Terms] OR "Interpersonal Relations"[MeSH Terms] OR "communication/psychology"[MeSH Terms] OR "psychosocial"[Title/Abstract] OR "job strain"[Title/Abstract] OR "work strain"[Title/Abstract] OR "work demand"[Title/Abstract] OR "job demand"[Title/Abstract] OR "high demand"[Title/Abstract] OR "low control"[Title/Abstract] OR "lack of control"[Title/Abstract] OR "work control"[Title/Abstract] OR "job control"[Title/Abstract] OR "decision latitude"[Title/Abstract] OR "work influence"[Title/Abstract] OR "demand resource"[Title/Abstract] OR "effort reward"[Title/Abstract] OR "time pressure"[Title/Abstract] OR "recuperation"[Title/Abstract] OR "work overload"[Title/Abstract] OR "work over load"[Title/Abstract] OR "recovery"[Title/Abstract] OR "coping"[Title/Abstract] OR "work ability"[Title/Abstract] OR "Social Support"[Title/Abstract] OR "support system"[Title/Abstract] OR "social network"[Title/Abstract] OR "emotional support"[Title/Abstract] OR "interpersonal relation"[Title/Abstract] OR "interaction"[Title/Abstract] OR

"justice\*"[Title/Abstract] OR "injustice\*"[Title/Abstract] OR "Job Satisfaction"[Title/Abstract] OR "work satisfaction"[Title/Abstract] OR "boredom"[Title/Abstract] OR "skill discretion\*"[Title/Abstract] OR "Staff Development"[Title/Abstract] OR "discrimination"[Title/Abstract] OR "harass\*"[Title/Abstract] OR ("workplace"[MeSH Terms] OR "workplace"[All Fields] OR ("work"[All Fields] AND "place"[All Fields]) OR "work-place"[All Fields]) AND "conflict\*"[Title/Abstract]) OR "workplace violen\*"[Title/Abstract] OR "work place violen\*"[Title/Abstract] OR "Bullying"[Title/Abstract] OR "victimization\*"[Title/Abstract] OR (("silent"[All Fields] OR "silently"[All Fields] OR "sile-  
nents"[All Fields]) AND "workplace\*"[Title/Abstract]) OR "role ambiguity"[Title/Abstract] OR "roleconflict\*"[Title/Abstract] OR "work role\*"[Title/Abstract] OR "working hour\*"[Title/Abstract] OR "working time"[Title/Abstract] OR "daytime"[Title/Abstract] OR "night-time"[Title/Abstract] OR "shift work\*"[Title/Abstract] OR "work shift\*"[Title/Abstract] OR "temporary work\*"[Title/Abstract] OR "full-time"[Title/Abstract] OR "part-time"[Title/Abstract] OR "flexible work\*"[Title/Abstract] OR "organizational change"[Title/Abstract] OR "organisational change"[Title/Abstract] OR "lean production"[Title/Abstract] OR "job security"[Title/Abstract] OR "job insecurity"[Title/Abstract]) OR ("Air Pollutants"[MeSH Terms] OR "Air Pollution"[MeSH Terms] OR "Fluids and Secretions"[MeSH Terms] OR "Toxic Actions"[MeSH Terms] OR "Solvents"[MeSH Terms] OR "pollut\*"[Title/Abstract] OR "indoor air\*"[Title/Abstract] OR "airborne"[Title/Abstract] OR ("smok\*"[Title/Abstract] AND "pollut\*"[Title/Abstract]) OR "passive smok\*"[Title/Abstract] OR "hazardous chemical\*"[Title/Abstract] OR "hazardous material\*"[Title/Abstract] OR "hazardous substance\*"[Title/Abstract] OR "toxic action\*"[Title/Abstract] OR "pesticide\*"[Title/Abstract] OR "poison\*"[Title/Abstract] OR "solvent\*"[Title/Abstract]) OR ("Radiation"[MeSH Terms] OR "air pollution, radioac-  
tive"[MeSH Terms] OR "Hot Temperature"[MeSH Terms] OR "Cold Temperature"[MeSH Terms] OR "Cli-  
mate"[MeSH Terms] OR "radiation\*"[Title/Abstract] OR "climate\*"[Title/Abstract] OR "cold temperature\*"[Title/Abstract] OR "hot temperature\*"[Title/Abstract]) OR ("Communicable Diseases"[MeSH Terms] OR "communicable dis-  
ease\*"[Title/Abstract] OR "contagious\*"[Title/Abstract]) OR ("Noise"[MeSH Terms] OR "noise\*"[Title/Abstract] OR ("Vibration"[MeSH Terms] OR "Motor Vehicles"[MeSH Terms] OR "Automobile Driving"[MeSH Terms] OR "driv-  
ing"[Title/Abstract] OR "automobile\*"[Title/Abstract] OR "car"[Title/Abstract] OR "cars"[Title/Abstract] OR "vi-  
brat\*"[Title/Abstract] OR "vehicle\*"[Title/Abstract] OR "truck\*"[Title/Abstract] OR "lorry"[Title/Abstract] OR "lor-  
ries"[Title/Abstract] OR "buses"[Title/Abstract] OR "hand held tool\*"[Title/Abstract] OR "hand tool\*"[Title/Abstract] OR "power tool\*"[Title/Abstract])) AND ("english"[Language] OR "danish"[Language] OR "norwegian"[Language] OR "swedish"[Language])
