# Supplementary material for: Association between occupational exposures and chronic low back pain: Protocol for a systematic review and meta-analysis
Source: PubMed Central journal article supplement (PMC10162539; doi:10.1371/journal.pone.0285327), 2023-05-05
Supplement: pone.0285327.s004.pdf [file pone.0285327.s004.pdf]

# Critical appraisal tool

| Case-Control Study                                                                                                                                                                                                                                                                                                                                                                                                                      | Yes | No | Unclear |
|-----------------------------------------------------------------------------------------------------------------------------------------------------------------------------------------------------------------------------------------------------------------------------------------------------------------------------------------------------------------------------------------------------------------------------------------|-----|----|---------|
| <b>Major Risk 1 – study design and selection</b>                                                                                                                                                                                                                                                                                                                                                                                        |     |    |         |
| <p><b>Were the cases recruited in an acceptable way?</b></p> <p>Consider the following:</p> <ul style="list-style-type: none"> <li>■ Are the cases representative of a population, clearly defined and differentiated from controls?</li> <li>■ Was there an established reliable system for selecting all the cases?</li> <li>■ Were inclusion and exclusion criteria explicit and applied similarly to all eligible cases?</li> </ul> |     |    |         |
| <p><b>Were the controls selected in an acceptable way?</b></p> <p>Consider the following:</p> <ul style="list-style-type: none"> <li>■ Are the controls representative of a population and clearly defined?</li> <li>■ Are the same inclusion and exclusion criteria for cases used to select controls (equally applied) and matched appropriately?</li> <li>■ Is it clearly established that controls are non-cases?</li> </ul>        |     |    |         |
| <p><b>Is the participation rate satisfactory?</b></p> <p>Consider the following:</p> <ul style="list-style-type: none"> <li>■ Are there large differences between the two groups?</li> <li>■ Is the participation rate low?</li> </ul>                                                                                                                                                                                                  |     |    |         |
| <b>Major risk 2 - Exposure</b>                                                                                                                                                                                                                                                                                                                                                                                                          |     |    |         |
| <p><b>Was the exposure accurately measured to minimise bias?</b></p> <p>Consider the following:</p> <ul style="list-style-type: none"> <li>■ Is the exposure clearly defined?</li> <li>■ Do measurements truly reflect what it is supposed to measure (have they been validated?).</li> </ul>                                                                                                                                           |     |    |         |

|                                                                                                                                                                                                                                                                                                                                              |  |  |  |
|----------------------------------------------------------------------------------------------------------------------------------------------------------------------------------------------------------------------------------------------------------------------------------------------------------------------------------------------|--|--|--|
| <ul style="list-style-type: none"> <li>■ Is the method of assessment reliable?</li> </ul>                                                                                                                                                                                                                                                    |  |  |  |
| <b>Major risk 3 – Outcome</b>                                                                                                                                                                                                                                                                                                                |  |  |  |
| <p><b>Was the outcome accurately measured to minimise bias?</b></p> <p>Consider the following:</p> <ul style="list-style-type: none"> <li>■ Is the outcome clearly defined?</li> <li>■ Do measurements truly reflect what it is supposed to measure (have they been validated?).</li> <li>■ Is the method of assessment reliable?</li> </ul> |  |  |  |
| <b>Major risk 4 – Non-participants</b>                                                                                                                                                                                                                                                                                                       |  |  |  |
| <p><b>Is comparison made between participants and non-participants?</b></p> <p>Consider the following:</p> <ul style="list-style-type: none"> <li>■ Is similarities or differences established?</li> </ul>                                                                                                                                   |  |  |  |
| <b>Major risk 5 – Analysis method</b>                                                                                                                                                                                                                                                                                                        |  |  |  |
| <p><b>Was the analysis method adequate?</b></p> <p>Consider the following:</p> <ul style="list-style-type: none"> <li>■ Are the main potential confounders identified and taken into account in the analysis?</li> <li>■ Were adequate statistical models used to reduce bias?</li> </ul>                                                    |  |  |  |
| <b>Minor risk 1 – Funding</b>                                                                                                                                                                                                                                                                                                                |  |  |  |
| <p><b>Was the source of funding provided?</b></p> <p>Consider the following:</p> <ul style="list-style-type: none"> <li>■ Was the study affected by sponsors?</li> <li>■ Did sponsoring organization participate in the analysis?</li> </ul>                                                                                                 |  |  |  |
| <b>Minor risk 2 – Chronology</b>                                                                                                                                                                                                                                                                                                             |  |  |  |

|                                                                                                                                                                                                                        |  |  |  |
|------------------------------------------------------------------------------------------------------------------------------------------------------------------------------------------------------------------------|--|--|--|
| <p><b>Could chronology be established?</b></p> <p>Consider the following:</p> <ul style="list-style-type: none"> <li>■ Was the timeframe sufficient to see an association between the exposure and outcome?</li> </ul> |  |  |  |
| <p><b>Minor risk 3 – Conflict of interest</b></p>                                                                                                                                                                      |  |  |  |
| <p><b>Was the study without any conflict of interest?</b></p> <p>Consider the following:</p> <ul style="list-style-type: none"> <li>■ Was the study affected by the authors affiliations or interests?</li> </ul>      |  |  |  |

| <b>Cohort Study</b>                                                                                                                                                                                                                                                                                                                                                                                             | <b>Yes</b> | <b>No</b> | <b>Unclear</b> |
|-----------------------------------------------------------------------------------------------------------------------------------------------------------------------------------------------------------------------------------------------------------------------------------------------------------------------------------------------------------------------------------------------------------------|------------|-----------|----------------|
| <p><b>Major Risk 1 – study design and selection</b></p>                                                                                                                                                                                                                                                                                                                                                         |            |           |                |
| <p><b>Was the cohort recruited in an acceptable way?</b></p> <p>Consider the following:</p> <ul style="list-style-type: none"> <li>■ Is it representative of a defined population and clearly specified?</li> <li>■ Are groups comparable in all respects other than the factor under investigation?</li> <li>■ Was everybody included who should have been?</li> </ul>                                         |            |           |                |
| <p><b>Was the follow-up of subjects acceptable?</b></p> <p>Consider the following:</p> <ul style="list-style-type: none"> <li>■ Conventionally, a 20% drop out rate is acceptable, but observational studies conducted over longer periods, a higher drop-out rate is to be expected.</li> <li>■ Were losses to follow-up taken into account in the analysis (sensitivity analysis, described etc.)?</li> </ul> |            |           |                |
| <p><b>Major risk 2 - Exposure</b></p>                                                                                                                                                                                                                                                                                                                                                                           |            |           |                |
| <p><b>Was the exposure accurately measured to minimise bias?</b></p> <p>Consider the following:</p>                                                                                                                                                                                                                                                                                                             |            |           |                |

|                                                                                                                                                                                                                                                                                                                                                                                                                                                                                                                                                                          |  |  |  |
|--------------------------------------------------------------------------------------------------------------------------------------------------------------------------------------------------------------------------------------------------------------------------------------------------------------------------------------------------------------------------------------------------------------------------------------------------------------------------------------------------------------------------------------------------------------------------|--|--|--|
| <ul style="list-style-type: none"> <li>■ Is the exposure clearly defined?</li> <li>■ Do measurements truly reflect what it is supposed to measure (have they been validated?).</li> <li>■ Is the method of assessment reliable?</li> <li>■ Were all the subjects classified into exposure groups using the same procedure?</li> </ul>                                                                                                                                                                                                                                    |  |  |  |
| <b>Major risk 3 – Outcome</b>                                                                                                                                                                                                                                                                                                                                                                                                                                                                                                                                            |  |  |  |
| <p><b>Was the outcome accurately measured to minimise bias?</b></p> <p>Consider the following:</p> <ul style="list-style-type: none"> <li>■ Is the outcome clearly defined?</li> <li>■ Do measurements truly reflect what it is supposed to measure (have they been validated?).</li> <li>■ Is the method of assessment reliable?</li> <li>■ Were the measurement methods similar in the different groups?</li> <li>■ If blinding is not possible, is there some recognition that knowledge of exposure status could influence the assessment of the outcome?</li> </ul> |  |  |  |
| <b>Major risk 4 – Enrolment</b>                                                                                                                                                                                                                                                                                                                                                                                                                                                                                                                                          |  |  |  |
| <p><b>Was the outcome taken into account at enrolment?</b></p> <p>Consider the following:</p> <ul style="list-style-type: none"> <li>■ Some participants might have the outcome at the time of enrolment. Is it assessed at baseline in the analysis?</li> </ul>                                                                                                                                                                                                                                                                                                         |  |  |  |
| <b>Major risk 5 – Analysis method</b>                                                                                                                                                                                                                                                                                                                                                                                                                                                                                                                                    |  |  |  |
| <p><b>Was the analysis method adequate?</b></p> <p>Consider the following:</p> <ul style="list-style-type: none"> <li>■ Are the main potential confounders identified and taken into account in the analysis?</li> <li>■ Were adequate statistical models used to reduce bias?</li> </ul>                                                                                                                                                                                                                                                                                |  |  |  |
| <b>Minor risk 1 – Funding</b>                                                                                                                                                                                                                                                                                                                                                                                                                                                                                                                                            |  |  |  |
| <p><b>Was the source of funding provided?</b></p>                                                                                                                                                                                                                                                                                                                                                                                                                                                                                                                        |  |  |  |

|                                                                                                                                                                                                                               |  |  |  |
|-------------------------------------------------------------------------------------------------------------------------------------------------------------------------------------------------------------------------------|--|--|--|
| Consider the following:<br>■ Was the study affected by sponsors?<br>■ Did sponsoring organization participate in the analysis?                                                                                                |  |  |  |
| <b>Minor risk 2 – Chronology</b>                                                                                                                                                                                              |  |  |  |
| <b>Could chronology be established?</b><br><br>Consider the following:<br>■ Was the timeframe sufficient to see an association between the exposure and outcome?<br>■ Was the follow-up long enough for the outcome to occur? |  |  |  |
| <b>Minor risk 3 – Conflict of interest</b>                                                                                                                                                                                    |  |  |  |
| <b>Was the study without any conflict of interest?</b><br><br>Consider the following:<br>■ Was the study affected by the authors affiliations or interests?                                                                   |  |  |  |
